# Supplementary material for: Germline variant burden in cancer genes correlates with age at diagnosis and somatic mutation burden
Source: Nat Commun. 2020 May 15;11:2438. doi: 10.1038/s41467-020-16293-7 (PMC7228928; doi:10.1038/s41467-020-16293-7)
Supplement: Supplementary file 4 — Supplementary Data 1 [file 41467_2020_16293_MOESM4_ESM.xlsx]

## Sheet: sTable2
Supplementary Data 1: Nanostring Cancer Hallmark Pathways
Adaptive_immunity	Angiogenesis	Cancer_driver_genes	Cell_cycle_and_apoptosis	Chromatin_modification	DNA_repair	Epithelial-mesenchymal_transition	Extracellular_matrix	Hedgehog_pathway	Humoral_immunity	Inflammation	Innate_immunity	JAK-STAT_pathway	MAPK_pathway	Metastasis	Notch_pathway	PI3K_pathway	RAS_pathway	TGFB_pathway	Transcriptional_misregulation	Wnt_pathway
ALCAM	+
CD22	+
CD37	+
CD38	+
CD3D	+
CD3E	+
CD3EAP	+
CD3G	+
CD40	+																			+
CD40LG	+
CD5	+
CD53	+
CD58	+
CD6	+
CD7	+
CD70	+
CD74	+
CD79A	+
CD79B	+
CD80	+
CD81	+
CD86	+
CD8A	+
CD8B	+
CSF2RB	+						+
CTLA4	+
CTSH	+	+					+
CTSL	+														+
CTSS	+
CX3CL1	+	+
CX3CR1	+
CXCL11	+							+
CXCL16	+
CXCR3	+	+
CXCR4	+						+	+							+
CXCR5	+
ENTPD1	+
GNLY	+
GZMA	+
GZMB	+																			+
GZMH	+
HLA-A	+
HLA-B	+
HLA-C	+
HLA-DMA	+
HLA-DMB	+
HLA-DOB	+
HLA-DPA1	+
HLA-DPB1	+														+
HLA-DQA1	+
HLA-DQB1	+
HLA-DRA	+
HLA-DRB3	+
HLA-DRB4	+
ICOS	+
ICOSLG	+
IL12A	+												+
IL12B	+												+
IL12RB1	+
IL12RB2	+												+
IL15	+	+											+
IL15RA	+
IL2	+
IL21	+
IL21R	+
IL2RB	+												+				+			+
IL2RG	+
IL7R	+												+				+
ITK	+
JAM3	+	+					+
LAG3	+
LY9	+
PDCD1LG2	+
PRF1	+						+								+
PSMB9	+
RAG1	+
SLAMF1	+
STAT4	+												+
STAT5B	+
STAT6	+
TAL1	+	+
TIGIT	+
TNFRSF11A	+
TXK	+
ZAP70	+
CCL15	+										+
CXCL14	+										+
CXCL9	+										+
FCER2	+										+
IL2RA	+										+		+				+
CXCL13	+	+					+			+	+
CXCL10	+	+									+	+
IFNG	+							+		+			+		+				+
IL7	+									+			+				+
PDCD1	+									+
IFNB1	+									+		+
BCL10	+											+
BTK	+											+
CD4	+											+
GZMK	+						+					+
GZMM	+											+
PIK3CD	+	+		+								+	+		+		+	+
PIK3CG	+	+		+								+	+		+		+	+
SYK	+	+										+			+		+
AAMP		+
ACVRL1		+						+
ADAM15		+						+
ADAM8		+						+
ADD1		+
ADM2		+
ADRA2B		+
AGGF1		+
AGT		+						+
AKT1		+	+	+			+						+	+	+		+	+
AKT2		+		+									+	+	+		+	+
AKT3		+		+			+						+	+	+		+	+
ANG		+						+
ANGPT1		+													+		+	+
ANGPT2		+													+
ANGPTL4		+
ANPEP		+
ANXA2P2		+						+
APOD		+
APOH		+						+
AQP1		+
ATPIF1		+
BAD		+		+													+	+
BAI1		+
BAI3		+
BMP4		+						+	+										+
BMPER		+
BTG1		+
C3		+										+
C3AR1		+									+
CALCRL		+
CAMP		+									+
CASP8		+	+	+								+			+
CAV1		+					+
CCBE1		+						+
CCL11		+						+			+
CCR2		+						+			+
CCR3		+
CD34		+
CDC42		+
CDH13		+
CEACAM1		+					+
CHI3L1		+
CHP1		+
CHP2		+
CHR 7		+
CIB1		+
CLIC4		+					+
CMA1		+						+			+
COL18A1		+						+
COL4A2		+						+							+
CSPG4		+
CTNNB1		+	+				+														+
CXCL17		+
CXCL8		+						+
CYP1B1		+					+
DICER1		+
DLL4		+														+
ECM1		+						+
ECSCR		+
EGF		+						+						+	+		+	+
EGFL7		+						+
EIF2AK3		+
ELK3		+
EMCN		+
ENPEP		+
EPAS1		+
EPHA1		+					+
EPHA2		+															+	+
EPHB1		+
EPHB3		+
EPHB4		+
ERBB2		+	+				+								+
EREG		+
F3		+						+
FAP		+					+
FASLG		+		+										+			+	+
FGF18		+												+			+	+
FGF2		+						+						+			+	+
FGF9		+						+						+			+	+
FGFR1		+												+			+	+
FGFR2		+	+					+						+			+	+
FIGF		+															+	+
FLT1		+													+		+	+		+
FLT4		+													+
FN1		+					+	+							+		+
FOXC2		+					+
FOXO4		+																+
GATA4		+
GJA5		+
GPI		+								+
GPR124		+
GPR56		+					+
GPX1		+
GREM1		+					+	+
GTF2I		+
HDAC5		+			+
HGF		+						+							+		+	+
HIF1A		+						+							+
HIPK1		+
HIPK2		+
HMOX1		+													+
HOXA5		+
HOXA7		+
HOXB13		+
HOXB3		+
HPSE		+													+
HRAS		+	+											+	+		+	+
HSPB1		+												+
HSPG2		+						+
ID1		+						+											+
IL18		+													+
IL1A		+		+				+			+	+		+
IL1B		+		+				+			+	+		+	+
IL6		+								+			+		+		+			+
ISL1		+
ITGA5		+					+	+				+
ITGB1		+					+	+
ITGB1BP1		+
ITGB3		+						+							+		+
JAG1		+					+									+
JUN		+												+							+
KDR		+
KLK3		+
KRAS		+	+											+	+		+	+
KRIT1		+
KRT1		+						+
LAMA5		+						+									+
LOXL2		+					+	+
LRG1		+
MAP2K1		+	+									+		+	+		+	+
MAP2K2		+										+		+	+		+	+
MAP3K7		+										+
MAPK1		+						+				+		+	+		+	+	+
MAPK3		+						+				+		+	+		+	+	+
MAPKAPK3		+
MCAM		+													+
MED1		+
MEG3		+
MEOX2		+					+
MMP14		+						+
MMP2		+					+	+							+
MMRN2		+						+
MTDH		+
A15		+
NCL		+
NF1		+	+											+				+
NFAT5		+
NFATC2		+
NODAL		+					+	+											+
NOS3		+													+		+
NOTCH1		+	+				+									+
NOX5		+
NPR1		+
NR4A1		+												+	+		+
NRCAM		+
NRP1		+
NRP2		+
NRXN1		+
NRXN3		+
NTRK1		+		+										+						+
OVOL2		+					+
PDCD10		+
PDCL3		+
PDGFA		+						+						+			+	+		+
PDGFRB		+					+							+			+	+
PDPN		+
PIK3CA		+	+	+									+		+		+	+
PIK3R1		+	+	+									+		+		+	+
PIK3R2		+		+									+		+		+	+
PIK3R5		+		+									+		+		+	+
PIK3R6		+
PKNOX1		+
PLA2G10		+																+
PLA2G2A		+																+
PLA2G2D		+
PLA2G3		+																+
PLCG1		+													+
PLCG2		+													+			+
PLXDC1		+
PLXND1		+
PNPLA6		+
PPP1R16B		+
PPP3R1		+		+										+							+
PRKCB		+												+	+			+			+
PRKCG		+												+	+			+			+
PROK2		+
PTEN		+	+												+		+
PTGIS		+					+
PTGS2		+
PTK2		+					+	+
PTK2B		+
PTPRB		+
PTPRM		+
RAC1		+					+							+			+	+			+
RAC2		+												+				+			+
RAF1		+												+			+	+
RAMP1		+
RAMP2		+
RBPJ		+
RGCC		+
RNH1		+
ROBO4		+
ROCK1		+						+
ROCK2		+						+
RORA		+
RRAS		+
RTN4		+
RUNX1		+	+					+							+					+
S100A7		+										+
S1PR1		+
SCG2		+
SEMA3E		+
SERPINE1		+					+	+							+
SERPINF1		+					+	+
SETD2		+	+
SFRP1		+					+	+													+
SFRP2		+						+													+
SHB		+
SIRT1		+
SLC12A6		+
SLIT2		+					+
SOX17		+																			+
SPARC		+					+	+
SPHK2		+
SPINK5		+
SRC		+													+
SRF		+
SRPK2		+
SRPX2		+
STAB1		+
STAB2		+
STAT1		+										+	+
SULF1		+
TBX1		+
TBX4		+
TBXA2R		+
TDGF1		+
TEK		+													+
TGFB2		+		+			+	+						+					+
TGFBI		+						+
TGFBR2		+					+	+						+					+	+
THBS1		+						+			+						+		+
THBS2		+						+
THBS4		+						+									+
THY1		+
TIE1		+
TMEM100		+
TMPRSS6		+
TNFRSF12A		+
TNFRSF1A		+
TNFSF12		+
TNMD		+
TWIST1		+					+								+
TYMP		+
UTS2		+
VASH1		+
VAV2		+
VAV3		+					+
VEGFA		+						+							+		+	+
VEGFB		+						+
VEGFC		+															+	+
VEZF1		+
WARS		+
WNT5A		+					+		+												+
ZC3H12A		+
ABL1			+	+														+
ACVR1B			+																+
ALK			+
AMER1			+
APC			+												+						+
AR			+
ARID1A			+		+
ARID1B			+
ARID2			+
ASXL1			+
ATM			+	+		+														+
ATRX			+
AXIN1			+																		+
B2M			+
BAP1			+
BCL2			+	+													+
BCOR			+
BRAF			+											+
BRCA1			+			+											+
BRCA2			+			+
CARD11			+
CBL			+										+
CDH1			+				+	+							+
CDKN2A			+	+											+
CEBPA			+																	+
CIC			+
CREBBP			+	+	+			+				+	+		+	+			+		+
CRLF2			+										+
CSF1R			+									+					+	+		+
CYLD			+									+
DAXX			+											+
DNMT1			+
DNMT3A			+
EGFR			+				+							+	+		+	+
EP300			+	+				+				+	+		+	+			+		+
EZH2			+
FBXW7			+
FGFR3			+				+							+			+	+
FLT3			+																	+
FOXL2			+
FUBP1			+
GATA1			+
GATA2			+
GATA3			+
GNA11			+
GNAQ			+
GNAS			+
H3F3A			+																	+
HIST1H3B			+																	+
HNF1A			+
IDH1			+
IDH2			+
JAK1			+									+	+				+
JAK2			+									+	+				+
JAK3			+									+	+				+
KDM5C			+
KDM6A			+																	+
KIT			+														+	+
KLF4			+
KMT2C			+
KMT2D			+
MAP3K1			+									+		+
MED12			+
MEN1			+																	+
MET			+												+		+	+		+
MLH1			+
MPL			+										+
MSH2			+
MSH6			+
MYD88			+	+								+
NCOR1			+																	+
NF2			+												+
NFE2L2			+
NOTCH2			+													+
NPM1			+
NRAS			+											+			+	+
PAX5			+							+										+
PBRM1			+
PDGFRA			+											+			+	+
PHF6			+
PPP2R1A			+					+									+		+
PRDM1			+
PTCH1			+						+
PTPN11			+										+					+
RB1			+	+											+
RET			+
RNF43			+
SETBP1			+
SF3B1			+
SMAD2			+	+			+	+							+				+
SMAD4			+	+				+							+				+		+
SMARCA4			+
SMARCB1			+
SMO			+						+
SOCS1			+										+
SOX9			+				+								+
SPOP			+
SRSF2			+
STAG2			+	+
STK11			+														+
TET2			+
TNFAIP3			+									+
TP53			+	+										+	+		+			+	+
TRAF7			+
TSC1			+														+
TSHR			+												+
U2AF1			+
VHL			+												+
WT1			+																	+
ATR				+
BAX				+
BCL2L1				+								+	+				+	+		+
BID				+
BIRC3				+																+
BIRC7				+
CAPN2				+
CASP10				+								+
CASP12				+
CASP3				+										+
CASP7				+
CASP9				+													+
CCNA1				+																+
CCNA2				+
CCNB1				+
CCNB3				+
CCND1				+									+				+				+
CCND2				+									+				+			+	+
CCND3				+									+				+				+
CCNE1				+													+
CCNE2				+													+
CDC14A				+
CDC14B				+
CDC25A				+
CDC25B				+										+
CDC25C				+
CDC6				+
CDC7				+
CDK2				+													+
CDK4				+													+
CDK6				+													+
CDKN1A				+											+		+			+
CDKN1B				+													+			+
CDKN1C				+
CDKN2B				+															+
CDKN2C				+																+
CDKN2D				+
CHEK1				+
CHEK2				+
CHUK				+								+		+			+	+
CUL1				+				+											+		+
E2F1				+
E2F5				+															+
ENDOG				+
FAS				+										+
GADD45A				+										+
GADD45B				+										+
GADD45G				+										+
GSK3B				+					+								+				+
HDAC1				+	+											+				+
HDAC2				+	+											+				+
IKBKB				+								+		+			+	+
IKBKG				+								+		+			+	+
IL1R1				+								+		+
IL1RAP				+								+
IL3				+									+				+			+
IL3RA				+									+				+
IRAK2				+								+
IRAK3				+
MAD2L2				+		+
MAP3K14				+										+
MCM2				+
MCM4				+
MCM5				+
MCM7				+
MDM2				+													+			+
MYC				+				+					+	+	+		+		+	+	+
NFKB1				+								+		+	+		+	+		+
NFKBIA				+								+
NGF				+										+			+	+
PCNA				+		+
PIK3CB				+									+				+	+
PIK3R3				+									+				+	+
PKMYT1				+
PPP3CA				+										+							+
PPP3CB				+										+							+
PPP3CC				+										+							+
PPP3R2				+										+							+
PRKACA				+					+					+				+			+
PRKACB				+					+					+				+			+
PRKACG				+					+					+				+			+
PRKAR1B				+
PRKAR2A				+
PRKAR2B				+
PRKDC				+		+
PRKX				+					+					+				+			+
PTTG2				+
RAD21				+
RBX1				+				+							+				+		+
RELA				+								+		+			+	+		+
SFN				+
SKP1				+				+											+		+
SKP2				+
SMAD3				+				+											+		+
SMC1A				+
SMC1B				+
SMC3				+				+
TFDP1				+				+											+
TGFB1				+			+	+						+	+				+
TGFB3				+										+					+
TNF				+				+		+				+					+
TNFRSF10A				+
TNFRSF10B				+
TNFRSF10C				+
TNFRSF10D				+
TNFSF10				+											+
TTK				+
WEE1				+
BNIP3					+
HDAC10					+
HDAC11					+
HDAC4					+
HDAC6					+
HELLS					+
HMGA1					+
MAP3K12					+									+
NASP					+
NPM2					+
NSD1					+
PPARGC1A					+
PRMT8					+
RPS6KA5					+									+
SIRT4					+
SUV39H2					+
WHSC1L1					+
ALKBH2						+
ALKBH3						+
BRIP1						+
C19orf40						+
CCNO						+
DDB2						+
ERCC2						+
ERCC6						+
FANCA						+
FANCB						+
FANCC						+
FANCE						+
FANCF						+
FANCG						+
FANCL						+
FEN1						+
GTF2H3						+
H2AFX						+
LIG4						+
MDC1						+
MGMT						+
MNAT1						+
MUTYH						+
NBN						+
NTHL1						+
POLB						+
POLD1						+
POLD4						+
POLE2						+
POLR2D						+
POLR2H						+
POLR2J						+
RAD50						+
RAD51						+
RAD52						+
RFC3						+
RFC4						+
RPA3						+
RPS27A						+	+
UBB						+
UBE2T						+
XPA						+
XRCC4						+
ZBTB32						+
ADAP1							+
AGR2							+
AHNAK							+
AKAP12							+								+
AKAP2							+
ALOX5							+
ANGPTL2							+
AP1M2							+
ARAP2							+
AREG							+
ARHGAP32							+
ARHGDIB							+								+
ASPN							+	+
B3GNT3							+
BAG2							+
BCAS1							+
BGN							+	+
BICC1							+
BMP7							+	+											+
BNC2							+
C1S							+					+
CALD1							+
CBLC							+						+
CCL8							+				+
CD163							+
CD24							+
CD2AP							+
CD44							+	+							+
CD46							+					+
CDH11							+								+
CDH2							+
CDK14							+
CDS1							+
CEACAM5							+
CEACAM6							+
CEP170							+
CGN							+
CHRDL1							+
CKMT1A							+
CLDN3							+
CLDN4							+
CLDN7							+
CLEC2B							+
COL1A2							+	+							+		+
COL3A1							+	+									+
COL5A2							+	+									+
COL6A1							+	+
COL6A2							+	+
CRISPLD2							+	+
CTSK							+								+
CXADR							+
CXCL12							+								+
CYB561							+
DCN							+	+
DDR2							+
DENND5A							+
DESI1							+
DPT							+	+
DPYSL3							+
DSC2							+
ECM2							+	+
ELF3							+
EMP3							+
ENPP2							+
EPCAM							+
EPN3							+
EPS8L1							+
ERBB3							+
ERMP1							+
ESRP1							+
EVI2A							+
EVPL							+
F11R							+
FAM174B							+
FBLN1							+	+
FBN1							+	+
FBP1							+
FERMT2							+
FGL2							+
FHL1							+
FLI1							+
FSTL1							+
FUT3							+
FXYD6							+
GALNT7							+
GDF15							+
GIMAP4							+
GIMAP6							+
GLYR1							+
GRHL2							+
HDHD3							+
HEG1							+
IGF1							+								+		+	+		+
IGFBP4							+
IL10RA							+
IL1RN							+
ILK							+	+
IRF6							+
ISLR							+
ITGB4							+	+									+
ITGB6							+	+									+
ITM2A							+
JAM2							+
KCNJ8							+
KIAA1462							+
KRT14							+
KRT19							+
KRT7							+
LAD1							+	+
LGALS1							+	+
LHFP							+
LLGL2							+	+
LOX							+	+
LY96							+					+
MAF							+
MFAP4							+	+
MISP							+
MMP3							+	+							+					+
MMP9							+	+							+					+
MPDZ							+
MRC1							+
MS4A4A							+
MS4A6A							+
MUC1							+
MYLK							+								+
MYO1D							+
MYO5C							+
NAP1L3							+
NR3C1							+
OAS1							+
OCLN							+
OLFML2B							+	+
P3H1							+
PCOLCE							+	+
PDGFC							+										+	+
PKN1							+								+
PLEKHO1							+
PLS1							+
PLXNC1							+
PMP22							+
POPDC3							+
PPFIBP2							+
PPL							+
PRKCZ							+
PROM1							+								+					+
PRR15L							+
PRSS8							+
PTGDS							+
PTK6							+
PTPRC							+
PTRF							+
PTX3							+
PYCARD							+					+
QKI							+
RAB25							+
RBM47							+
RHOA							+	+										+	+		+
RUNX1T1							+													+
S100A14							+
SACS							+
SAMSN1							+
SCNN1A							+
SDC4							+	+
SERINC5							+
SERPING1							+					+
SH2B3							+
SH2D3A							+
SH3YL1							+
SLC35A3							+
SLC37A1							+
SLC44A4							+
SLPI							+	+
SMURF1							+	+
SNAI1							+	+							+
SNAI2							+								+
SNAI3							+
SORD							+
SOX2							+								+
SPARCL1							+
SPDEF							+
SPINT1							+
SPP1							+	+									+
SRGN							+
ST14							+
STAT3							+				+		+		+
SYNE1							+
TACSTD2							+
TCF3							+													+
TCF4							+
TFPI2							+
TIMP1							+	+							+
TJP2							+
TJP3							+
TMC6							+
TMEM30B							+
TMPRSS2							+													+
TMPRSS4							+
TNC							+	+									+
TNFSF13							+
TNS1							+
TOM1L1							+
TPM2							+
TSPAN1							+
TWIST2							+								+
UBA52							+
VAMP8							+
VCAM1							+	+
VCAN							+	+
VIM							+
VPS13A							+
VSIG4							+
WIPF1							+
WNT5B							+		+												+
WWTR1							+
ZCCHC24							+
ZEB1							+								+
ZEB2							+								+
ZFPM2							+
ABI3BP								+
ACHE								+
ACVR1								+
ACVR1C								+											+
ADAM17								+
ADAM28								+
ADAM9								+
ADAMTS1								+
ADAMTS12								+
ADAMTS8								+
AEBP1								+
AGRN								+
ALB								+
AMH								+											+
APOE								+
BMP5								+											+
BMPR1A								+
BMPR1B								+											+
BMPR2								+
CCDC80								+
CCL21								+
CCL7								+			+				+
CD36								+
CEP295								+
CFP								+				+
CHAD								+									+
CLDN1								+
CLEC3B								+
CLU								+				+
COL1A1								+							+		+
COL4A1								+
COL4A6								+									+
COL5A1								+									+
COL6A3								+
COL7A1								+
COMP								+									+
CRIP2								+
CTNND1								+
CTSG								+
DAG1								+
DLG1								+
DST								+
EDN1								+							+
EMILIN1								+
EMILIN3								+
ERBB2IP								+
FBLN5								+
FBN2								+
FMOD								+
FRAS1								+
FREM1								+
FREM2								+
FST								+											+
GDF5								+
GDF6								+											+
HAPLN1								+
HAS1								+
HSD17B12								+
HSP90B1								+									+
IBSP								+									+
ICAM1								+
ID2								+											+	+
ID4								+											+
IGFBP7								+
IL13RA2								+					+
IL1RL1								+				+
INHBA								+											+
INHBE								+
ITGA1								+
ITGA11								+
ITGA2								+									+
ITGA3								+									+
ITGA6								+									+
ITGA7								+							+		+
ITGA8								+									+
ITGA9								+									+
ITGAM								+				+
ITGB2								+
ITGB7								+									+			+
ITGB8								+									+
LAMA1								+									+
LAMA3								+									+
LAMA4								+
LAMB3								+									+
LAMC1								+
LAMC2								+									+
LEFTY1								+											+
LTBP4								+
LUM								+
MGP								+
MMP1								+
MMP10								+							+
MMP12								+
MMP13								+							+
MMP17								+
MMP24								+
NCAM1								+
NDNF								+
NDP								+
NID2								+
OGN								+
P3H2								+
PECAM1								+
PITX2								+											+
PKM								+
PLAU								+												+
POSTN								+
PPP2CB								+									+		+
PRELP								+
PRSS22								+
PXDN								+
RBL1								+
RBL2								+
RELN								+									+
RPS6KB1								+							+
RPS6KB2								+							+
SELE								+			+
SERPINA1								+
SERPINH1								+
SMAD1								+
SMAD5								+
SMAD9								+											+
SMOC1								+
SMURF2								+
SOD1								+
SP1								+											+	+
SPOCK3								+
SV2B								+
TIMP2								+							+
TIMP4								+							+
TNN								+									+
TNXB								+
TPSB2								+
TPSD1								+
VIT								+
VWA1								+
VWA2								+
ZFYVE16								+
ZFYVE9								+
BMP2									+										+
GAS1									+
GLI1									+
GLI3									+
HHIP									+
LRP2									+
WNT10A									+												+
WNT10B									+												+
WNT11									+												+
WNT16									+											+	+
WNT2									+												+
WNT2B									+												+
WNT3									+												+
WNT4									+												+
WNT6									+												+
WNT7A									+												+
WNT7B									+												+
ZIC2									+
AIRE										+
BLNK										+
BMI1										+
BST1										+
BST2										+		+
CCL16										+	+
CCL2										+
CCL3										+	+
CCR6										+		+
CCR7										+	+									+
CD28										+	+
CD83										+
CRP										+	+	+
EBI3										+
FOXJ1										+
LTA										+	+
LTF										+
LY86										+		+
MEF2C										+
MNX1										+
MS4A1										+
MS4A2										+	+
POU2AF1										+
POU2F2										+
PSMB10										+
SH2D1A										+
ST6GAL1										+
TFE3										+
TFEB										+
TREM1										+
TREM2										+
YTHDF2										+
C1QBP											+
CCL1											+
CCL13											+
CCL23											+
CCL24											+
CCL25											+
CCL26											+
CCL4											+
CCL5											+	+			+
CCR1											+
CCR4											+
CCRL2											+
CD97											+
CKLF											+
CREB5											+						+
CXCL1											+
CXCL2											+
CXCL3											+
CXCL6											+
CXCR1											+
CXCR2											+				+
FCER1A											+
FOXP3											+
FPR2											+
HMGB1											+	+
IDO1											+
IL13											+		+
IL17A											+
IL22											+
IL24											+		+
IL25											+
IL6ST											+
IL8											+	+								+
IL9											+
KLRB1											+
NFATC4											+
NOS2A											+
PNMA1											+
S100A8											+
XCR1											+
A2M												+
APP												+
ATF1												+
ATF2												+
ATG12												+
ATG5												+
AXL												+
C1QA												+
C1QB												+
C1R												+
C2												+
C4B												+
C4BPA												+
C5												+
C6												+
C7												+
C8A												+
C8B												+
C8G												+
C9												+
CARD9												+
CASP1												+
CCR9												+
CD14												+		+						+
CD180												+
CD55												+
CDK1												+
CFB												+
CFD												+
CFI												+
CLEC4A												+
CLEC4C												+
CLEC5A												+
CLEC6A												+
CLEC7A												+
COLEC12												+
CR1												+
CR2												+
CREB1												+
CSF1												+
CYBB												+			+
CYFIP2												+
DDX58												+
DEFB1												+
DMBT1												+
DUSP4												+		+
DUSP6												+		+						+
ECSIT												+
ELK1												+
F12												+
FADD												+
FCGR1A												+
FOS												+		+
HAMP												+
HCK												+
IFIH1												+
IFITM1												+
IFITM2												+
IFNA1												+
IFNA17												+	+				+
IFNA2												+	+				+
IFNA7												+	+				+
IFNA8												+
IFNGR1												+
IKBKE												+
IL18R1												+
IL18RAP												+
IL1RAPL2												+
IL1RL2												+
IL23A												+	+
IL27												+
IL34												+
IRAK1												+
IRAK4												+
IRF3												+
IRF7												+
IRGM												+
ISG15												+
ISG20												+
ITCH												+
ITGAX												+
KLRG1												+
LBP												+
LCN2												+
LGALS3												+
LILRA4												+
LILRA5												+
LYN												+
MAP2K4												+		+	+
MAP3K5												+		+
MAP4K2												+
MAPK11												+
MAPK14												+
MAPK8												+		+				+			+
MAPKAPK2												+
MARCO												+
MASP1												+
MASP2												+
MAVS												+
MBL2												+
MEFV												+
MIF												+
MST1R												+
MX1												+
NCF4												+
NFKB2												+
NLRC5												+
NLRP3												+
NOD1												+
NOD2												+
PIN1												+
PPARG												+								+
RIPK2												+
S100A12												+
S100B												+
SAA1												+
SIGIRR												+
SLAMF7												+
TAB1												+
TANK												+
TBK1												+
TICAM1												+
TICAM2												+
TIRAP												+
TLR1												+
TLR10												+
TLR2												+					+
TLR3												+
TLR4												+			+		+
TLR5												+
TLR6												+
TLR7												+
TLR8												+
TLR9												+
TOLLIP												+
TRAF2												+
TRAF3												+
TRAF6												+
TXNIP												+			+
TYK2												+
UBC												+
CLCF1													+
CNTFR													+
CSF2													+							+
CSF3													+				+
CSF3R													+				+
EPO													+				+
EPOR													+				+
GHR													+				+
GRB2													+	+			+	+
IL10													+
IL11													+		+
IL11RA													+
IL19													+
IL20RA													+
IL20RB													+
IL22RA1													+
IL22RA2													+
IL23R													+
IL5RA													+
IL6R													+				+
LEP													+
LEPR													+
LIF													+
LIFR													+		+
OSM													+				+
PIM1													+
PRL													+				+
PRLR													+				+
SOCS2													+
SOCS3													+
SOS1													+	+			+	+
SOS2													+	+			+	+
SPRY1													+
SPRY2													+
SPRY4													+
TPO													+
TSLP													+
BDNF														+
CACNA1C														+
CACNA1D														+
CACNA1E														+
CACNA1G														+
CACNA1H														+
CACNA2D1														+
CACNA2D2														+
CACNA2D3														+
CACNA2D4														+
CACNB2														+
CACNB3														+
CACNB4														+
CACNG1														+
CACNG4														+
CACNG6														+
DDIT3														+						+
DUSP10														+
DUSP2														+
DUSP5														+
DUSP8														+
FGF1														+			+	+
FGF10														+			+	+
FGF11														+			+	+
FGF12														+			+	+
FGF13														+			+	+
FGF14														+			+	+
FGF16														+			+	+
FGF17														+			+	+
FGF19														+			+	+
FGF20														+			+	+
FGF21														+			+	+
FGF22														+			+	+
FGF23														+			+	+
FGF3														+			+	+
FGF4														+			+	+
FGF5														+			+	+
FGF6														+			+	+
FGF7														+			+	+
FGF8														+			+	+
FGFR4														+	+		+	+
FLNA														+
FLNC														+
GNG12														+			+	+
HSPA1A														+
HSPA2														+
HSPA6														+
IL1R2														+						+
MAP2K6														+
MAP3K13														+
MAP3K8														+
MAPK10														+				+			+
MAPK12														+
MAPK8IP1														+
MAPK8IP2														+
MAPK9														+				+			+
MAPT														+
MECOM														+
NFATC1														+							+
NTF3														+
NTRK2														+
PDGFB														+			+	+
PLA2G4A														+				+
PLA2G4C														+				+
PLA2G4E														+				+
PLA2G4F														+				+
PRKCA														+			+	+			+
PTPN5														+
PTPRR														+
RAC3														+				+			+
RASGRF1														+				+
RASGRF2														+				+
RASGRP1														+				+
RASGRP2														+				+
RPS6KA6														+
RRAS2														+				+
STMN1														+
ZAK														+
ACTG2															+
ALDOA															+
BRMS1															+
CADM1															+
CAMK2A															+
CAMK2B															+						+
CAMK2D															+
CD82															+
CHD4															+
CNN1															+
CST7															+
DCC															+
DENR															+
DLC1															+
EGLN2															+
EGLN3															+
EIF4E2															+
EIF4EBP1															+		+
ENO1															+
ENO2															+
ENO3															+
ETV4															+					+
GSN															+
HK2															+
HK3															+
HKDC1															+
HUNK															+
KDM1A															+
KISS1															+
LDHA															+
MED23															+
MGAT5															+
MT3															+
MTA1															+
MTBP															+
MTOR															+		+
MYCL															+
MYH11															+
NDRG1															+
NME1															+
NME4															+
NOS2															+
NR4A3															+					+
PDK1															+
PEBP4															+
PFKFB1															+
PFKFB4															+
PGK1															+
PLAUR															+
PTTG1															+
RORB															+
SET															+
SLC2A1															+
SNRPF															+
SSTR2															+
TCEB1															+
TCEB2															+
TCF20															+
TF															+
APH1B																+
DLL1																+
DLL3																+
DTX1																+
DTX3																+
DTX4																+
HES1																+
HES5																+
JAG2																+
KAT2B																+
LFNG																+
MAML2																+
MFNG																+
NOTCH3																+
NUMBL																+
PTCRA																+				+
CD19																	+
COL11A1																	+
COL11A2																	+
COL24A1																	+
COL27A1																	+
COL2A1																	+
COL4A3																	+
COL4A4																	+
COL4A5																	+
COL6A6																	+
CREB3L1																	+
CREB3L3																	+
CREB3L4																	+
DDIT4																	+
EFNA1																	+	+
EFNA2																	+	+
EFNA3																	+	+
EFNA5																	+	+
GNG4																	+	+
GNG7																	+	+
GNGT1																	+	+
IGF1R																	+	+		+
IRS1																	+
KITLG																	+	+
LAMB4																	+
LAMC3																	+
MYB																	+
NGFR																	+	+		+
PCK1																	+
PDGFD																	+	+
PGF																	+	+
PPP2R2B																	+
PPP2R2C																	+
PRKAA2																	+
SGK2																	+
TCL1B																	+
THEM4																	+
TNR																	+
CALML3																		+
CALML5																		+
CALML6																		+
ETS2																		+
GRIN1																		+
GRIN2A																		+
GRIN2B																		+
LAT																		+
MLLT4																		+
PAK3																		+
PAK7																		+
PLA1A																		+
PLA2G5																		+
PLCE1																		+
PLD1																		+
RASA4																		+
RASAL1																		+
RIN1																		+
SHC1																		+
SHC2																		+
SHC3																		+
SHC4																		+
TIAM1																		+
ACVR2A																			+
BAMBI																			+		+
BMP6																			+
BMP8A																			+
INHBB																			+
LEFTY2																			+
LTBP1																			+
NOG																			+
ARNT2																				+
BAIAP3																				+
BCL2A1																				+
CEBPE																				+
ETV1																				+
ETV7																				+
EYA1																				+
FUT8																				+
GRIA3																				+
H3F3C																				+
HHEX																				+
HIST1H3G																				+
HIST1H3H																				+
HMGA2																				+
HOXA10																				+
HOXA11																				+
HOXA9																				+
HPGD																				+
IGFBP3																				+
MLF1																				+
MLLT3																				+
MPO																				+
MYCN																				+
NFKBIZ																				+
NUPR1																				+
PAX3																				+
PAX8																				+
PBX1																				+
PBX3																				+
PLAT																				+
PML																				+
RXRG																				+
SIN3A																				+
SIX1																				+
SSX1																				+
TLX1																				+
TSPAN7																				+
UTY																				+
WHSC1																				+
ZBTB16																				+
AXIN2																					+
CXXC4																					+
DKK1																					+
DKK2																					+
DKK4																					+
FOSL1																					+
FZD10																					+
FZD2																					+
FZD3																					+
FZD7																					+
FZD8																					+
FZD9																					+
GPC4																					+
LEF1																					+
MMP7																					+
NKD1																					+
PLCB1																					+
PLCB4																					+
SFRP4																					+
SOST																					+
TBL1XR1																					+
TCF7L1																					+
WIF1																					+
