# Supplementary material for: Germline variant burden in cancer genes correlates with age at diagnosis and somatic mutation burden
Source: Nat Commun. 2020 May 15;11:2438. doi: 10.1038/s41467-020-16293-7 (PMC7228928; doi:10.1038/s41467-020-16293-7)
Supplement: Supplementary file 5 — Supplementary Data 2 [file 41467_2020_16293_MOESM5_ESM.xlsx]

## Sheet: Sheet1
Supplementary Data 2 . NCCN Hereditary Cancer Genes
DICER1
GREM1
HOXB13
HRAS
NF1
PTEN
RUNX1
ALK
APC
ATM
BAP1
BRCA1
BRCA2
CDH1
CDKN2A
CEBPA
EGFR
GATA2
KIT
MEN1
MET
MLH1
MSH2
MSH6
NF2
PDGFRA
PTCH1
RB1
RET
SMAD4
SMARCA4
SMARCB1
STK11
TP53
TSC1
VHL
WT1
CDK4
CDKN1B
CDKN1C
CHEK2
BRIP1
MUTYH
NBN
NTHL1
POLD1
RAD50
EPCAM
BMPR1A
AXIN2
